# Supplementary material for: Diagnostic accuracy of the Whooley questions for the identification of depression: a diagnostic meta-analysis
Source: HighWire-hosted journal article supplement (doi:10.1136/bmjopen-2015-008913), 2015-12-01
Supplement: bmjopen-2015-008913supp_appendix1.pdf [file bmjopen-2015-008913supp_appendix1.pdf]

## Appendix One – Search strategy

### MEDLINE In-Process & Other Non-Indexed Citations and MEDLINE via OvidSP

<http://ovidsp.ovid.com/>

1946 to 30<sup>th</sup> September 2013

Searched on: 11<sup>th</sup> October 2013

Records retrieved: 2440

- 1 exp Depressive Disorder/ (82175)
- 2 Depression/ (76402)
- 3 (depression or depressive or depressed).ti,ab. (297196)
- 4 (melancholi\$ or dysphori\$ or dysthymi\$).ti,ab. (8577)
- 5 1 or 2 or 3 or 4 (337560)
- 6 Whooley.ti,ab. (9)
- 7 (two adj3 (question or questions)).ti,ab. (5571)
- 8 (2 question or 2 questions).ti,ab. (340)
- 9 two item\$.ti,ab. (1216)
- 10 2 item\$.ti,ab. (598)
- 11 2CFQ.ti,ab. (1)
- 12 (PHQ 2 or PHQ2).ti,ab. (120)
- 13 Patient Health Questionnaire 2.ti,ab. (56)

14 6 or 7 or 8 or 9 or 10 or 11 or 12 or 13 (7759)  
15 5 and 14 (639)  
16 (casefinding or (case adj (finding or identification))).ti,ab. (4152)  
17 ((brief or short) adj2 screen\$).ti,ab. (2071)  
18 16 or 17 (6210)  
19 5 and 18 (617)  
20 \*Depressive Disorder/di [Diagnosis] (7361)  
21 \*Depression/di [Diagnosis] (4667)  
22 20 or 21 (11707)  
23 \*Questionnaires/ (29520)  
24 22 and 23 (491)  
25 \*Psychiatric Status Rating Scales/ (8005)  
26 22 and 25 (1230)  
27 \*Mass Screening/ (43202)  
28 22 and 27 (453)  
29 24 or 26 or 28 (1974)  
30 15 or 19 or 29 (3020)  
31 exp animals/ not humans/ (4050087)  
32 30 not 31 (3003)  
33 (comment or editorial or letter).pt. (1309722)  
34 32 not 33 (2869)  
35 limit 34 to yr="1994 -Current" (2440)
