# Supplementary material for: Diagnostic accuracy of the Whooley questions for the identification of depression: a diagnostic meta-analysis
Source: HighWire-hosted journal article supplement (doi:10.1136/bmjopen-2015-008913), 2015-12-01
Supplement: bmjopen-2015-008913supp_appendix2.pdf [file bmjopen-2015-008913supp_appendix2.pdf]

## Appendix 2

During the conduct of this systematic review we were alerted to considerable confusion in the literature between the Whooley questions and the PHQ-2. A number of studies labelled them as one type of screen but actually used and referenced the other one. The table below lists the questions for both 2-item screens. It demonstrates similarities and differences between the two regarding language, time frame and scoring.

| Similarities/differences between the 2 two-question screeners |                                                                                                                                                                                                                   |              |                                                                                                                                   |                                                                   |
|---------------------------------------------------------------|-------------------------------------------------------------------------------------------------------------------------------------------------------------------------------------------------------------------|--------------|-----------------------------------------------------------------------------------------------------------------------------------|-------------------------------------------------------------------|
| 2 question screen                                             | Questions                                                                                                                                                                                                         | Time frame   | Scoring                                                                                                                           | Positive screen                                                   |
| Whooley Questions                                             | 1) "During the past month, have you often been bothered by feeling down, depressed, or hopeless?"<br><br>2) "During the past month, have you often been bothered by little interest or pleasure in doing things?" | Past month   | Dichotomous:<br><br>'yes'/'no'                                                                                                    | 'yes' to either one or both questions                             |
| PHQ-2                                                         | "Over the last 2 weeks, how often have you been bothered by any of the following problems?"<br><br>1) "little interest or pleasure in doing things?"<br><br>2) "feeling down, depressed or hopeless?"             | Last 2 weeks | By frequency:<br><br>(0) "not at all"<br><br>(1) "several days"<br><br>(2) "more than half the days"<br><br>(3) nearly every day" | Score can range from 0 to 6:<br><br>0 = lowest<br><br>6 = highest |
